# Supplementary material
Source: PubMed Central journal article supplement (PMC11028345)
Supplement: 262_2018_2154_MOESM1_ESM.pdf [file 262_2018_2154_MOESM1_ESM.pdf]

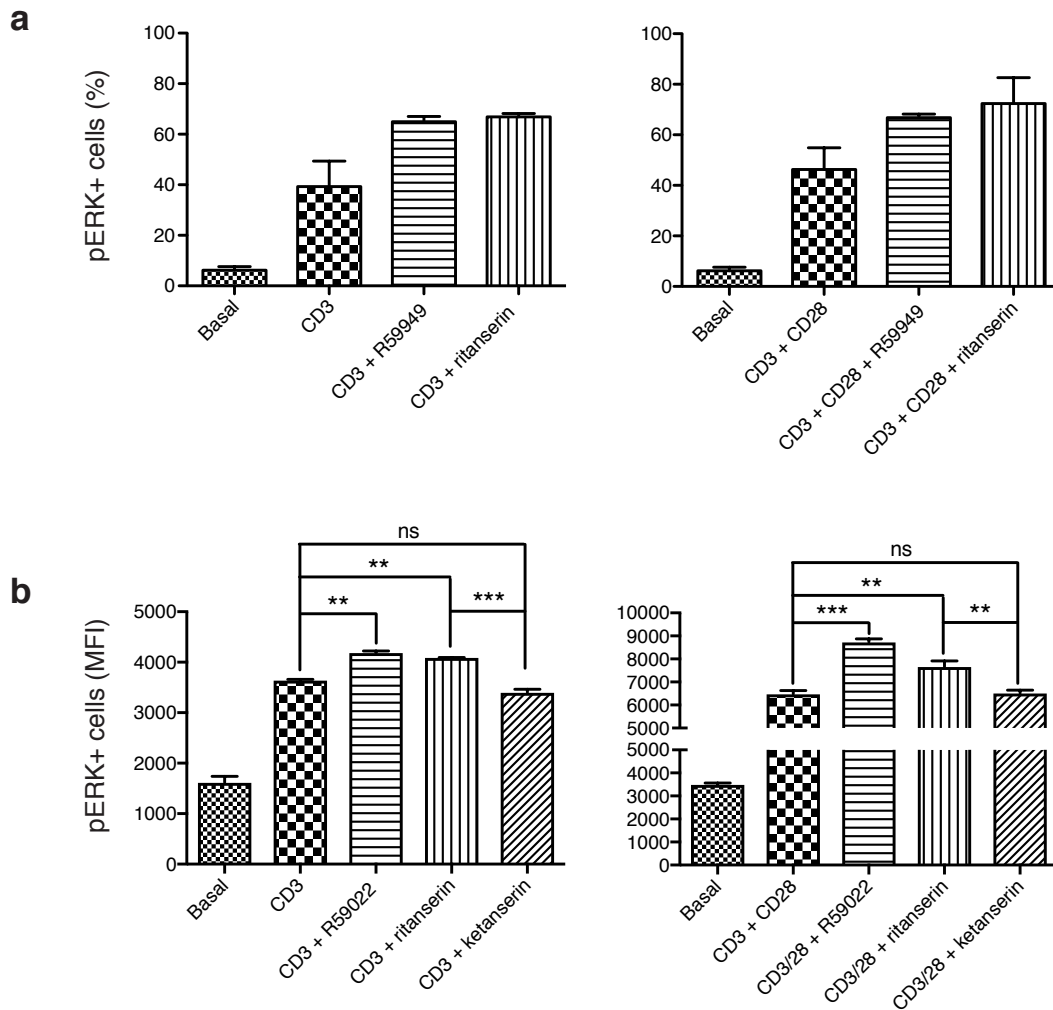

**Supplementary Figure 1.** DGK $\alpha$  negatively controls ERK phosphorylation downstream of TCR and is specifically targeted by R59949 and ritanserin, but not by ketanserin. Jurkat cells were stimulated with anti-CD3 or -CD3/CD28 mAb (15 min), alone or with the indicated drug. pERK was determined by flow cytometry analysis. **a**, Percentage of pERK<sup>+</sup> cells. **b**, MFI of pERK. Results from three independent experiments are shown. Data were analyzed using one-way ANOVA and Bonferroni post-test. \*\*\* p < 0.001; \*\* p < 0.01.

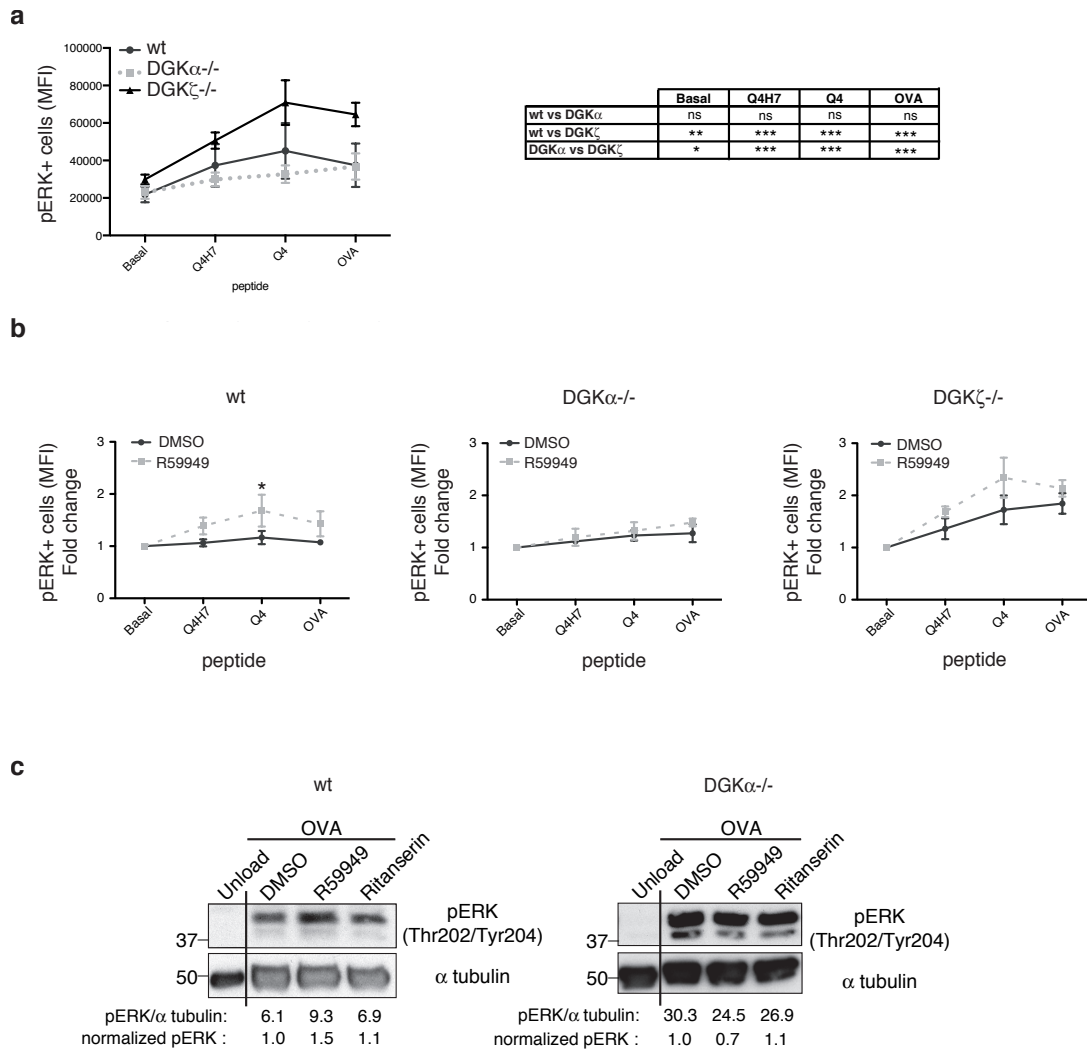

**Supplementary Figure 2.** DGK negatively controls ERK phosphorylation downstream of TCR. **a**, Spleen cells from wt or DGK-deficient OT-I transgenic mice were loaded with indicated peptides, alone or with R59949. ERK1/2 phosphorylation and CD44 expression were determined in the CD8<sup>+</sup> T subset by flow cytometry. MFI of pERK in the CD44<sup>low</sup> population of samples without DGKi. **b**, Values for the MFI of pERK in the CD44<sup>low</sup> population were normalized to basal conditions to determine the DGKi effect in each genotype. Results summarize the results of two experiments, each with 3 mice/genotype. Data were analyzed using two-way ANOVA and Bonferroni post-test. Statistical results of the comparisons in a) are summarized in the table. Significant differences are indicated in b). **c**, CD8<sup>+</sup> cells from OT-I wt or DGK $\alpha^{-/-}$  mice were differentiated to CTL. Cells were stimulated with EL-4 cells, unloaded or loaded with the cognate OVA peptide (40 min), alone or with R59949 or ritanserin. ERK1/2 phosphorylation was evaluated using phospho-specific antibodies and corrected to  $\alpha$ -tubulin values. Values for pERK/ $\alpha$ -tubulin ratios and normalized values (basal condition = 1.0) are shown beneath the blots.

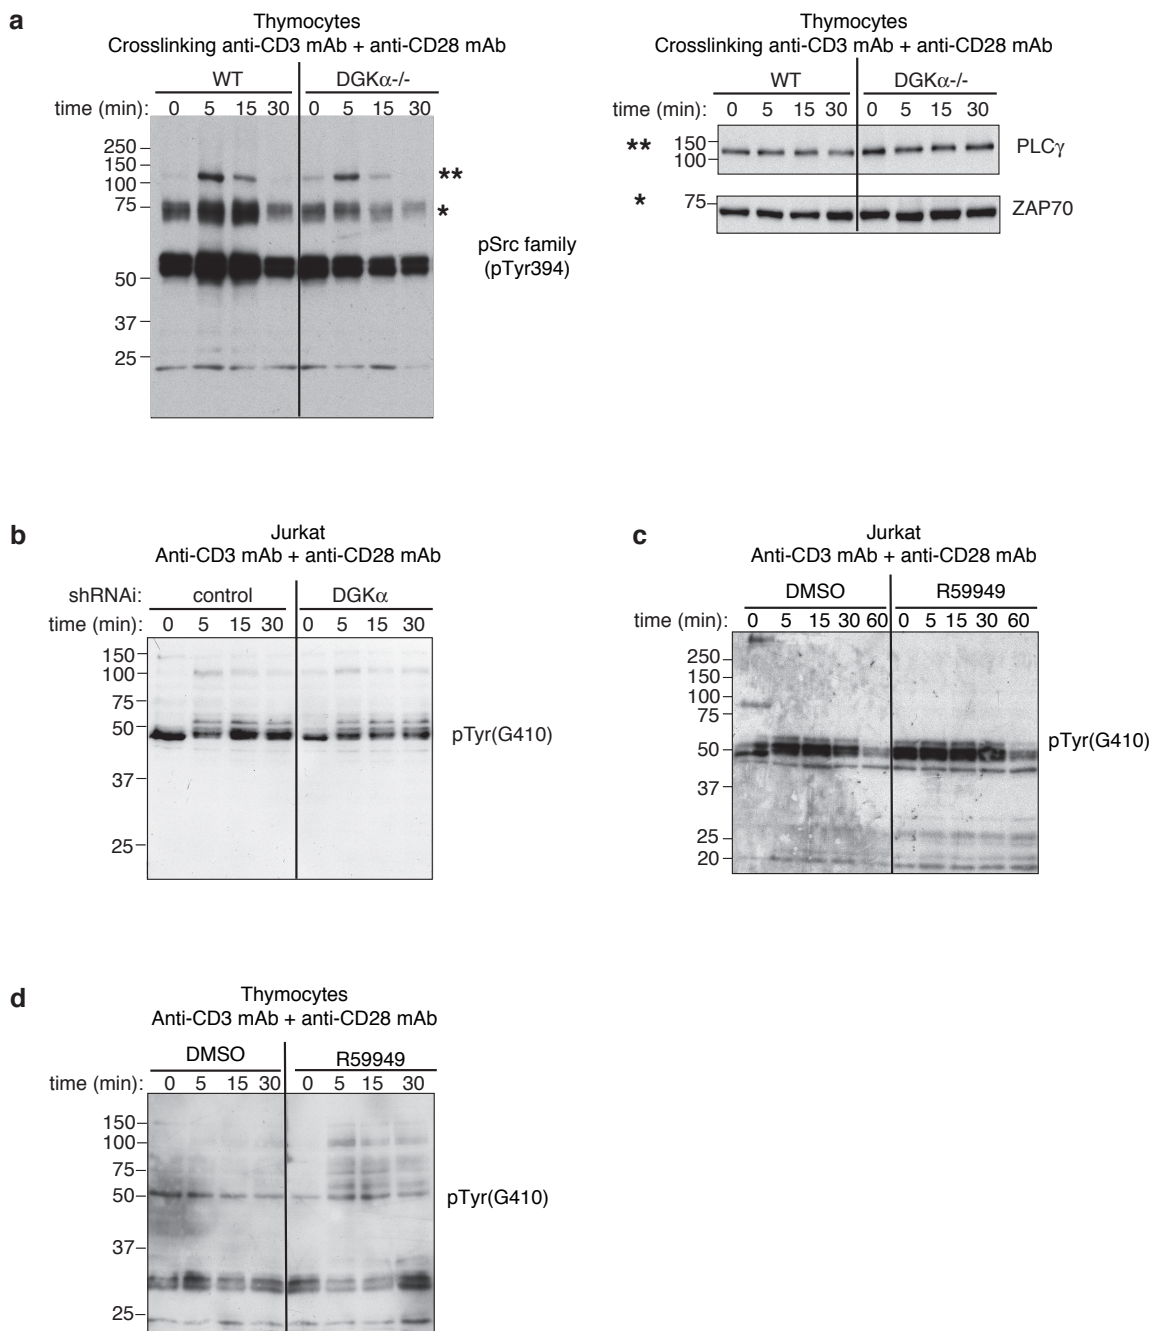

**Supplementary Figure 3.** Effects of DGK $\alpha$  on p-Tyr signaling. **a**, Complete and overexposed profiles of the blot in Fig. 3a with the anti-pSrc-family Ab. The Ab recognized proteins in addition to Lck, indicated with \* and \*\* (left). PLC $\gamma$  and ZAP-70 were analyzed in a second blot of the same samples (right). **b-d**, The total phosphotyrosine profile of Jurkat or thymus cells in Fig. 3 was analyzed by western blot. **b**, Control and silenced Jurkat cells. **c**, Jurkat cells or **d**, thymus cells, vehicle- or R59949-treated. Results shown for a representative experiment ( $n = 3$ ).

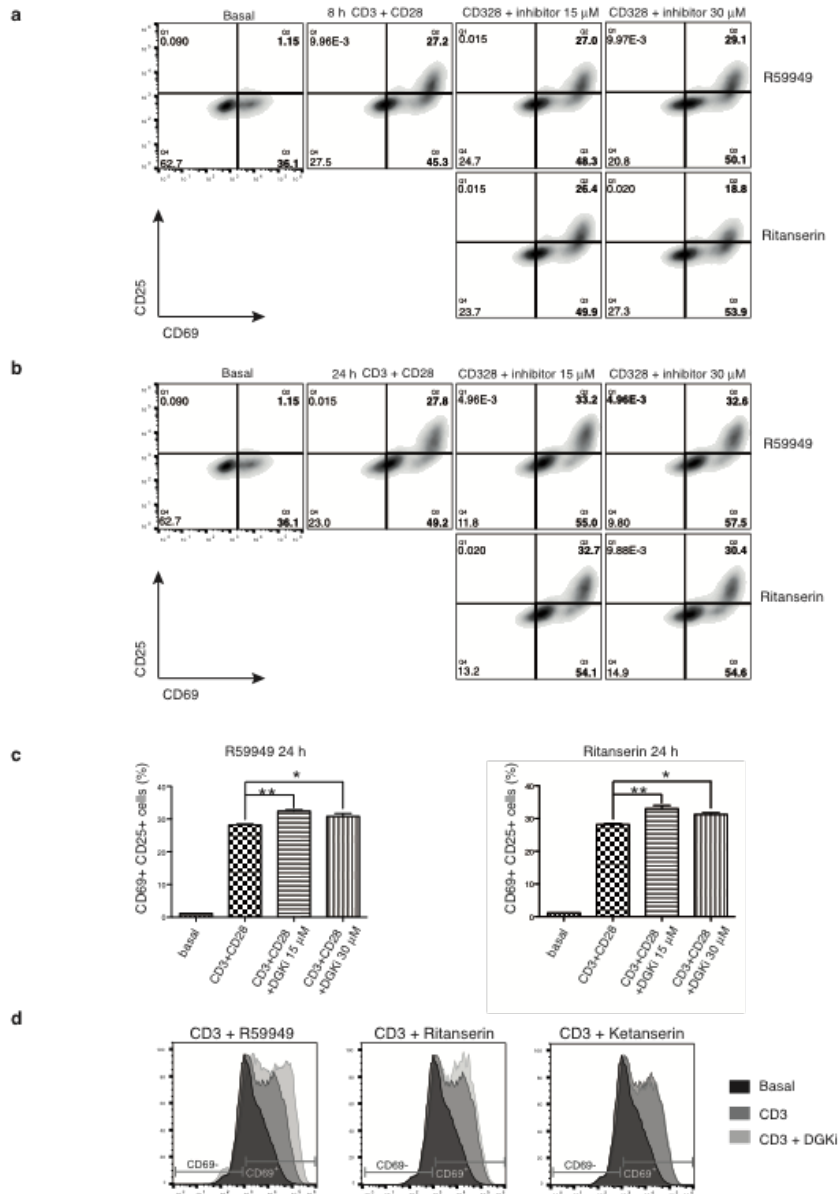

**Supplementary Figure 4.** R59949 and ritanserin enhanced CD69 and CD25 expression in Jurkat cells. Jurkat T cells were stimulated with anti-CD3/CD28, alone or with 15 or 30  $\mu\text{M}$  R59949 or ritanserin. CD69 and CD25 expression were analyzed by flow cytometry. Biparametric dot plots of CD25 vs CD69 after **a**, 8 h, and **b**, 24 h. One representative experiment is shown of at least 3 performed. **c**, Percentage of CD69 and CD25 double-positive cells after 24 h treatment. Results shown for a representative experiment, with three replicates, of at least three independent series of experiments with similar results. Data were analyzed using one-way ANOVA and Bonferroni post-test. \*\*  $p < 0.01$ ; \*  $p < 0.05$ . **d**, R59949 and ritanserin, but not ketanserin, enhanced the number of CD69<sup>+</sup> cells. Jurkat T cells were stimulated with anti-CD3, alone or with R59949, ritanserin or ketanserin (6 h). CD69 expression was analyzed by flow cytometry. The percentage of CD69<sup>+</sup> cells is shown. Results shown for a representative experiment ( $n = 3$ ).

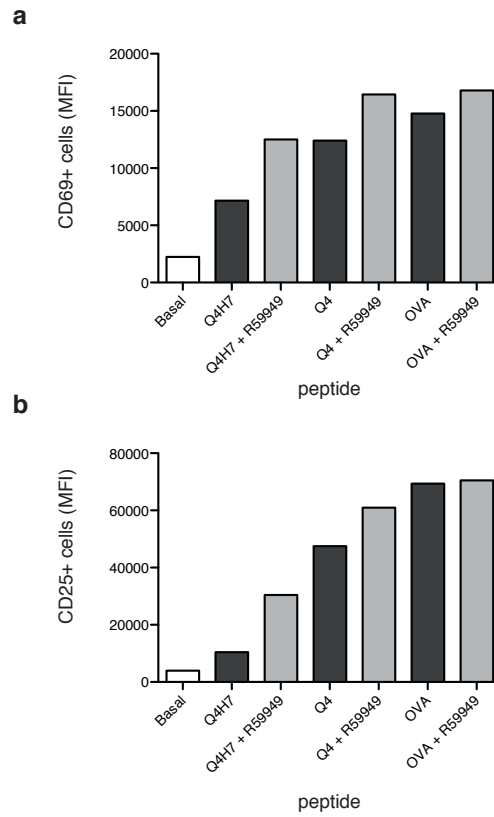

**Supplementary Figure 5.** R59949 enhances CD69 and CD25 expression after TCR stimulation in spleen CD8<sup>+</sup> T cells from OT-I transgenic mice. The cells were stimulated with the indicated peptide, alone or with R59949 (24 h); the activation state was evaluated by measuring **a**, CD69 and **b**, CD25 expression. Results shown for a representative experiment of at least two independent series of experiments with similar results.

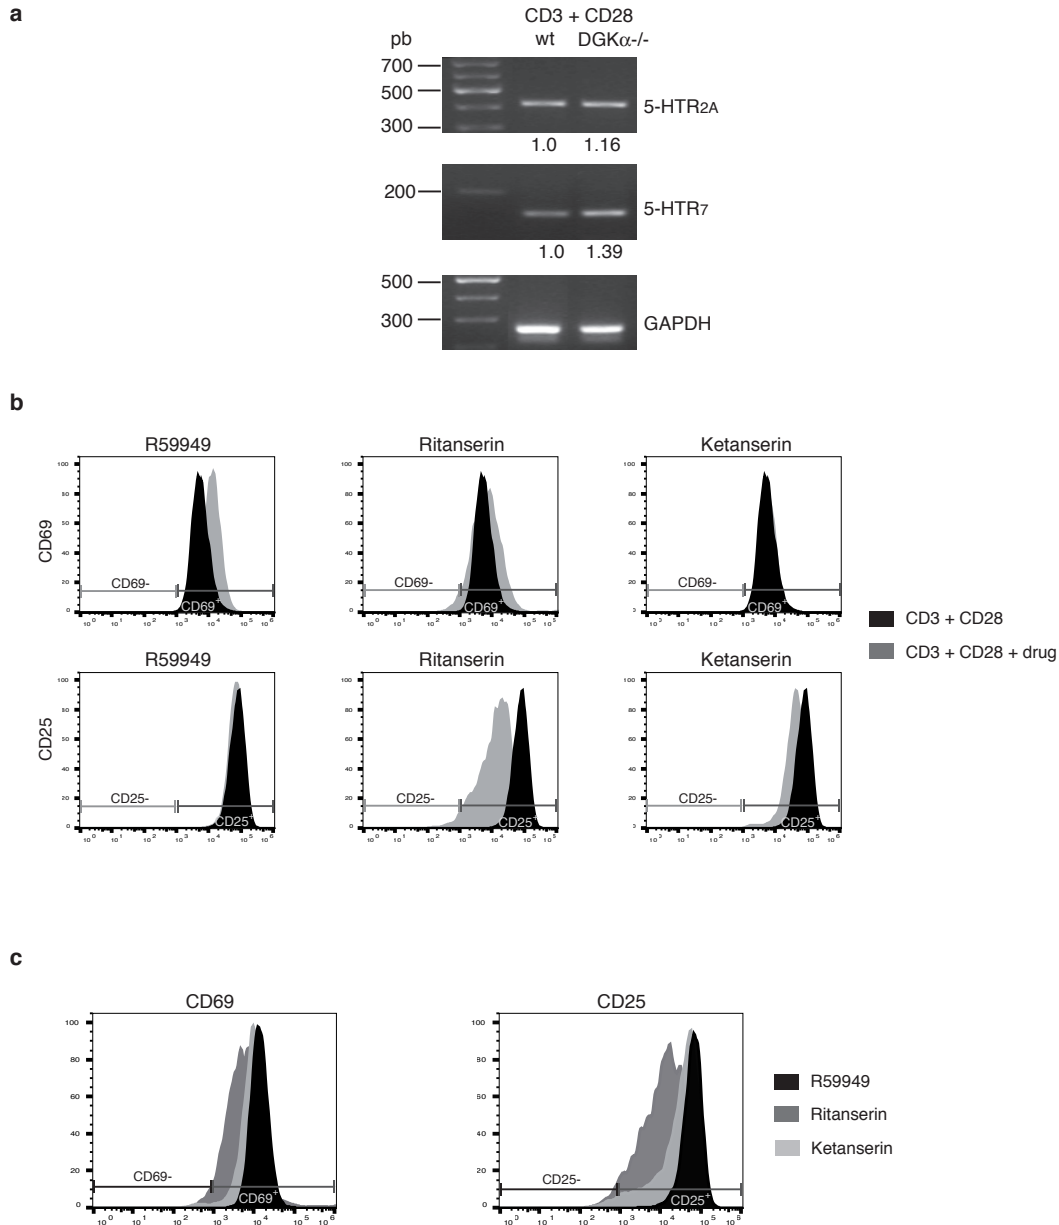

**Supplementary Figure 6.** R59949 and ritanserin have distinct effects in naïve T cell activation. **a**, 5-HTR expression in activated mouse T cells. Naïve lymph node cells from C57BL/6J wt and  $DGK\alpha^{-/-}$  mice were stimulated with anti-CD3/CD28 mAb (48 h) and 5-HT<sub>2A</sub> and 5-HT<sub>7</sub> expression were analyzed by RT-PCR. Expression of each 5-HTR was corrected to that of GAPDH and normalized to values for wt. **b**, Spleen T cells were activated with anti-CD3/CD28 mAb, alone or with the indicated drug (48 h). Cell surface CD69 and CD25 expression were analyzed by flow cytometry in CD8<sup>+</sup> T cells. The percentage of CD69<sup>+</sup> or CD25<sup>+</sup> cells in untreated and drug-treated conditions is shown in each histogram. **c**, as in **b**), using lymph node T cells. The percentage of CD69<sup>+</sup> or CD25<sup>+</sup> cells with each different drug treatment is shown in each histogram. Results are representative of three experiments with similar results.

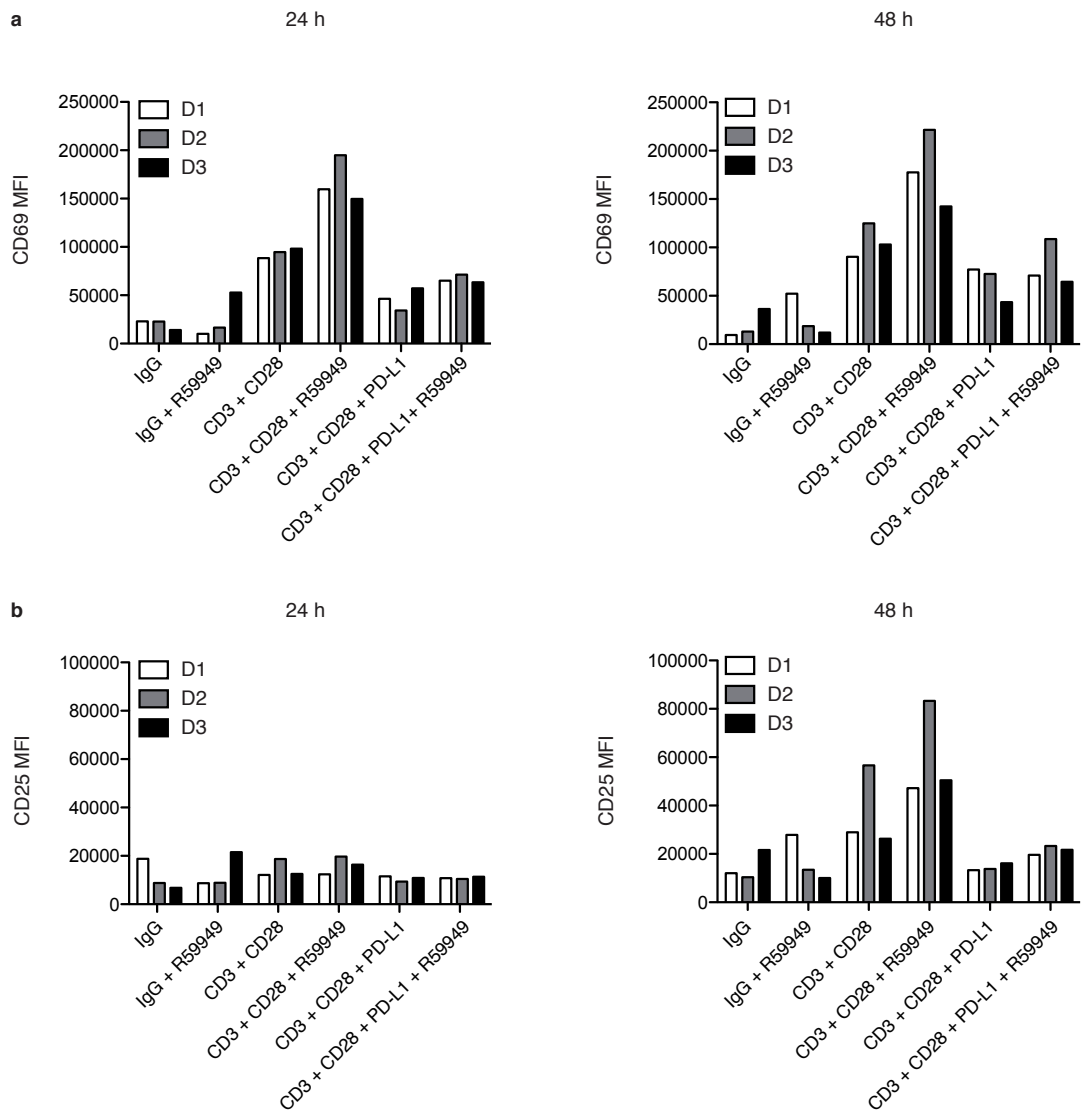

**Supplementary Figure 7.** DGK $\alpha$  inhibition increases CD69 and CD25 expression after TCR costimulation or the PD-1/PD-L1 immune checkpoint. PBMC from three healthy donors (D1-3) were purified with anti-CD8-coupled beads and stimulated with IgG, anti-CD3/CD28 or anti-CD3/CD28 + PD-L1 for indicated times, alone or with R59949. CD69 and CD25 induction were analyzed by flow cytometry. **a**, MFI of CD69 and **b**, CD25 in the double-positive cells.
